# Supplementary material
Source: PubMed Central journal article supplement (PMC3660003)
Supplement: supp_2012.082875_2012_082875-Contributions.pdf [file supp_2012.082875_2012_082875-Contributions.pdf]

**Manuscript no. HAEMATOL/2012/082875 entitled “Favorable long-term outcome of patients with 13q deletion and aplastic anemia”**

**Authors: Andreas Holbro, Martine Jotterand, Jakob R. Passweg, Andreas Buser, André Tichelli, and Alicia Rovó**

**Information about the contributions of each person named as having participated in the study**

**1) Guarantor(s), i.e., person(s) who is (are) responsible for the integrity of the work as a whole:**

- Alicia Rovó, Division of Hematology, University Hospital Basel, Switzerland, arovo@uhbs.ch
- Andreas Holbro, Division of Hematology, University Hospital Basel, Switzerland, aholbro@uhbs.ch

According to the International Committee of Medical Journal Editors (ICMJE) ([http://www.icmje.org/ethical\\_1author.html](http://www.icmje.org/ethical_1author.html)): “Authorship credit should be based on: 1) substantial contributions to conception and design, acquisition of data, or analysis and interpretation of data; 2) drafting the article or revising it critically for important intellectual content; and 3) final approval of the version to be published. Authors should meet conditions 1, 2, and 3. Acquisition of funding, collection of data, or general supervision of the research group alone does not constitute authorship”.

**The guarantors of this manuscript confirm that all persons designated as authors qualify for authorship, and that each author has participated sufficiently in the work to take public responsibility for appropriate portions of the content.**

**2) Authors who participated in the conception of the study:** Holbro Andreas, Jotterand Martine, Passweg Jakob, Buser Andreas, Tichelli André, Rovó Alicia

**3) Design & Methods. The following authors were responsible for specific investigations:**

- Holbro Andreas, Jotterand Martine, Tichelli André, and Rovó Alicia were responsible for study design

**4) Results. The following authors were responsible for specific portions of the results, including figures and tables:**

- Holbro Andreas and Rovó Alicia were responsible for data collection
- Holbro Andreas, Jotterand Martine, Passweg Jakob, Buser Andreas, Tichelli André, and Rovó Alicia were responsible for data analysis and data interpretation
- Jotterand Martine was responsible for cytogenetic analysis of the specimens

**5) Writing the manuscript. The following authors were responsible for writing the manuscript:**

- Holbro Andreas, Jotterand Martine, Passweg Jakob, Buser Andreas, Tichelli André, and Rovó Alicia were responsible for writing of the manuscript

**6) Contributors Listed in Acknowledgments:**

We thank the collaborators of the Unité de cytogénétique du cancer, University of Lausanne for performing the cytogenetic analysis

The authors report no potential conflict of interest.
